# Supplementary material for: Strong inter-model differences and biases in CMIP6 simulations of PM 2.5 , aerosol optical depth, and precipitation over Africa
Source: Copernicus journal article supplement (doi:10.5194/egusphere-2024-3057), 2024-10-23
Supplement: Supplementary file 1 [file egusphere-2024-3057-supplement.pdf]

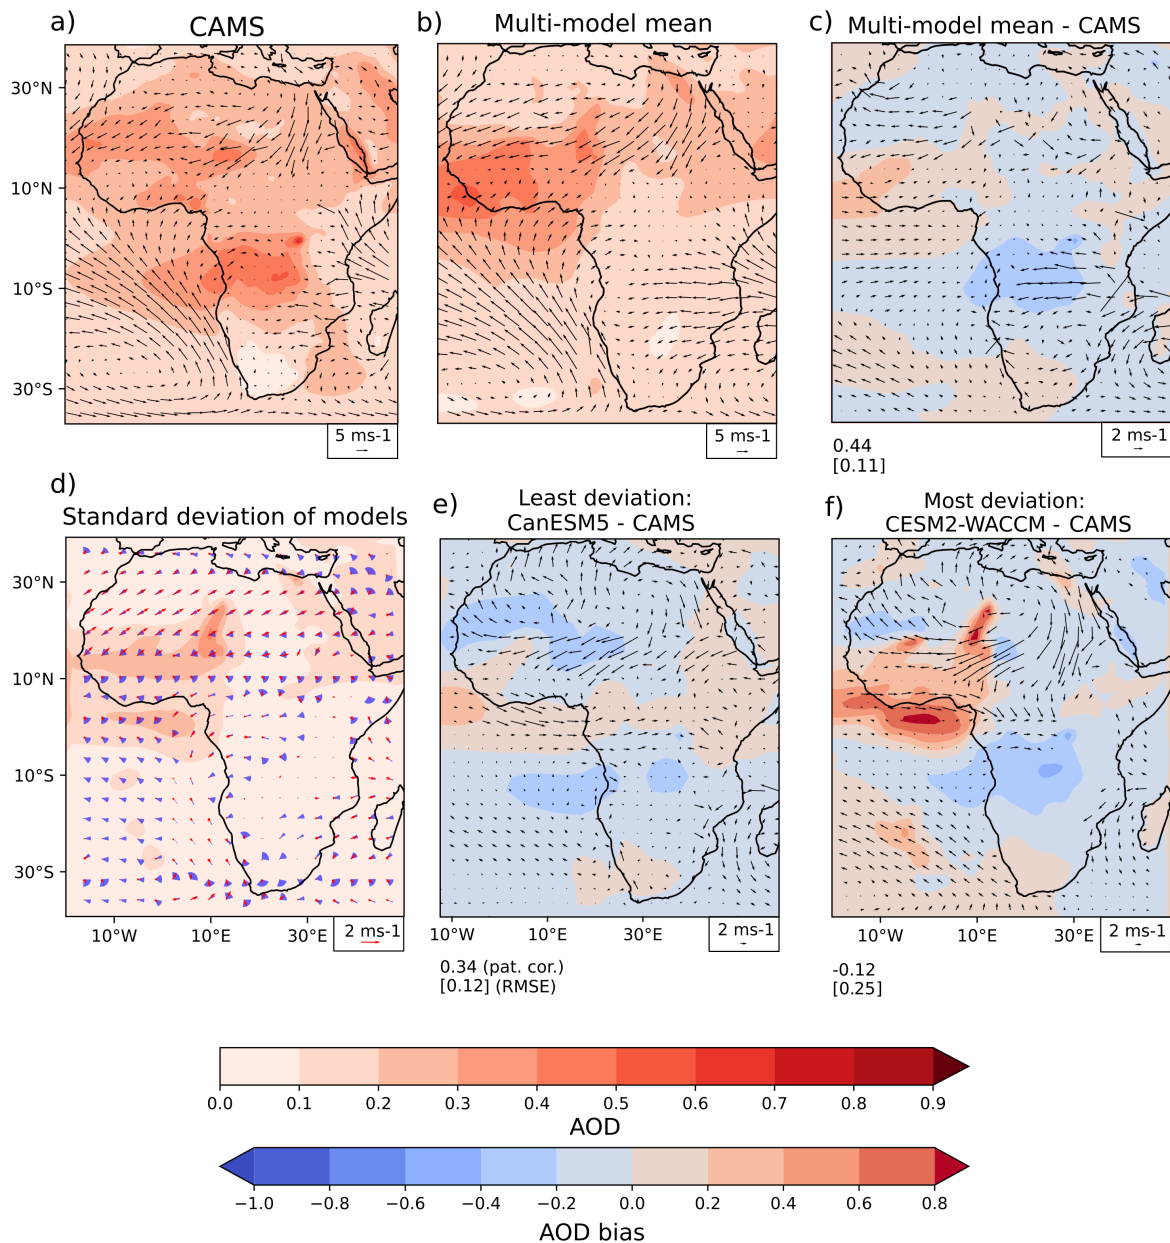

**Figure S1.** SON-mean total AOD at 550 nm and winds at 925 hPa for 2002–2023 in (a) observations (CAMS/ERA5) and (b) CMIP6 MMM. (c) CMIP6 MMM bias against observations and (d) intermodel standard deviation for precipitation. Bias in mean AOD at 550 nm in the models with the (e) least (CanESM5) and (f) most (CESM2-WACCM) deviation from CAMS as determined by pattern correlation. Pattern correlation with CAMS is shown below

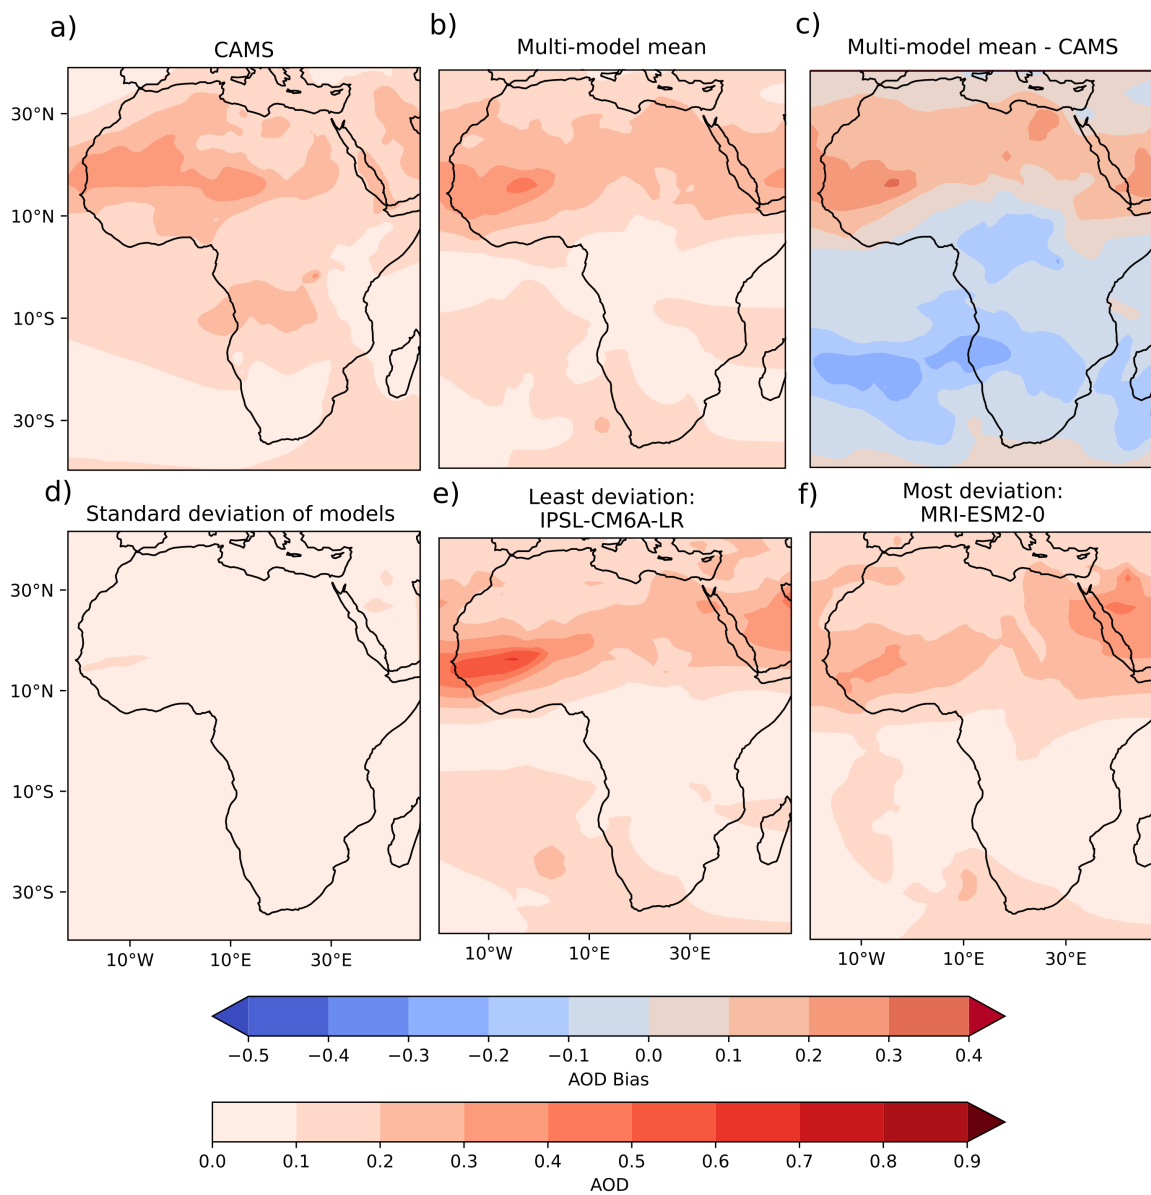

**Figure S2.** SON-mean total AOD at 870 nm for 2002–2023 in (a) observations (CAMS) and (b) CMIP6 MMM. (c) CMIP6 MMM bias against observations and (d) intermodel standard deviation for precipitation. Mean AOD at 870 nm in the models with the (e) least (IPSL-CM6A-LR) and (f) most (MRI-ESM2-0) deviation from CAMS as determined by pattern correlation.

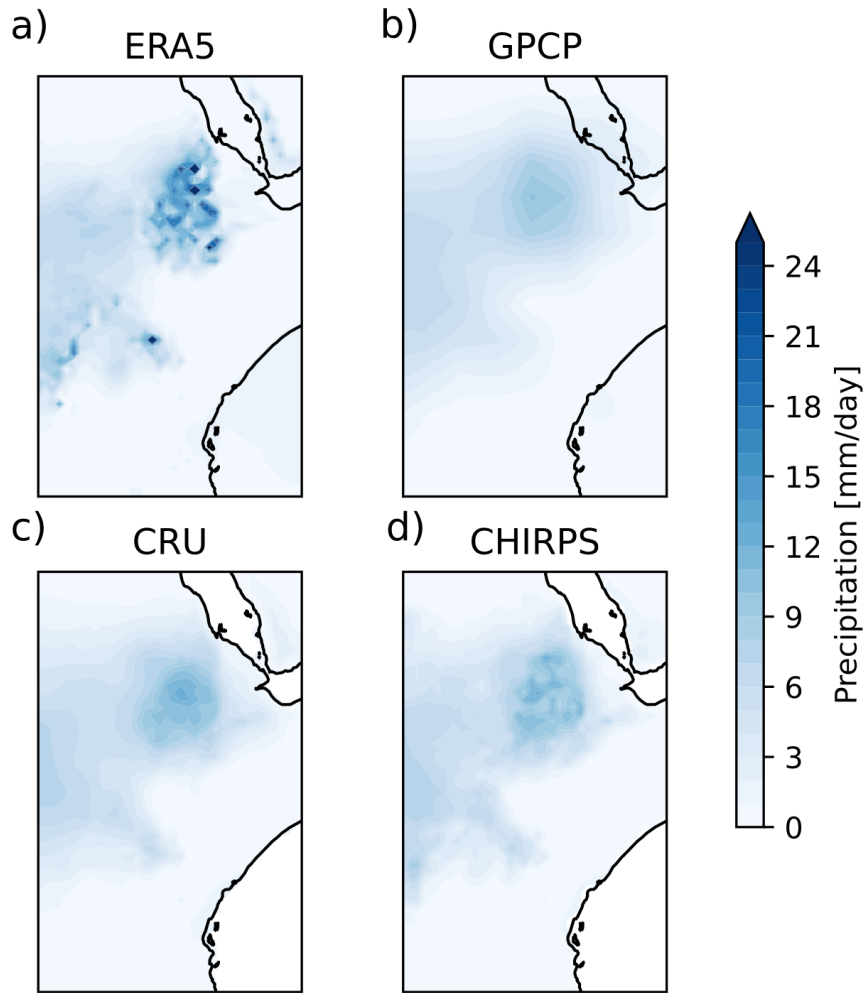

**Figure S3.** Average distribution of rainfall in August from 1981-2023 for a) ERA5 b) GPCP c) CRU and d) CHIRPS, demonstrating the high orographical rainfall in ERA5 not present in other observational datasets.

| U.S. Embassy Location | Model             | R <sup>2</sup> | RMSE ( $\mu\text{gm}^{-3}$ ) | MAE ( $\mu\text{gm}^{-3}$ ) |
|-----------------------|-------------------|----------------|------------------------------|-----------------------------|
| Accra                 | GFDL-ESM4         | 0.50           | 12.24                        | 7.00                        |
|                       | GISS-E2-1-G       | 0.55           | 11.69                        | 6.76                        |
|                       | IPSL-CM5A2-INCA   | 0.36           | 13.91                        | 8.34                        |
|                       | MIROC6            | 0.38           | 13.68                        | 8.59                        |
|                       | NorESM1-LM        | 0.42           | 13.27                        | 7.77                        |
|                       | CESM2             | 0.51           | 12.21                        | 7.83                        |
|                       | EC-Earth3-AerChem | 0.64           | 10.44                        | 6.90                        |
|                       | UKESM1-0-LL       | 0.53           | 11.94                        | 7.09                        |
| Ouagadougou           | GFDL-ESM4         | 0.39           | 22.95                        | 15.55                       |
|                       | GISS-E2-1-G       | 0.45           | 21.93                        | 14.84                       |
|                       | IPSL-CM5A2-INCA   | 0.27           | 25.14                        | 17.48                       |
|                       | MIROC6            | 0.13           | 27.46                        | 19.93                       |
|                       | NorESM1-LM        | 0.50           | 20.85                        | 15.67                       |
|                       | CESM2             | 0.38           | 23.13                        | 17.40                       |
|                       | EC-Earth3-AerChem | 0.32           | 24.31                        | 16.90                       |
|                       | UKESM1-0-LL       | 0.27           | 25.14                        | 17.27                       |
| Abidjan               | GFDL-ESM4         | 0.56           | 8.09                         | 6.21                        |
|                       | GISS-E2-1-G       | 0.59           | 7.83                         | 6.35                        |
|                       | IPSL-CM5A2-INCA   | 0.39           | 9.52                         | 7.31                        |
|                       | MIROC6            | 0.34           | 9.93                         | 8.01                        |
|                       | NorESM1-LM        | 0.45           | 9.01                         | 6.72                        |
|                       | CESM2             | 0.37           | 9.69                         | 7.72                        |
|                       | EC-Earth3-AerChem | 0.57           | 7.96                         | 6.34                        |
|                       | UKESM1-0-LL       | 0.60           | 7.71                         | 6.21                        |
| Abuja                 | GFDL-ESM4         | 0.62           | 21.97                        | 14.68                       |
|                       | GISS-E2-1-G       | 0.50           | 25.36                        | 15.68                       |
|                       | IPSL-CM5A2-INCA   | 0.34           | 29.10                        | 19.02                       |
|                       | MIROC6            | 0.20           | 32.00                        | 22.02                       |
|                       | NorESM1-LM        | 0.29           | 30.20                        | 23.17                       |
|                       | CESM2             | 0.37           | 28.50                        | 19.87                       |
|                       | EC-Earth3-AerChem | 0.35           | 28.81                        | 20.07                       |
|                       | UKESM1-0-LL       | 0.40           | 27.82                        | 17.33                       |
| Addis Ababa           | GFDL-ESM4         | 0.02           | 7.44                         | 5.90                        |
|                       | GISS-E2-1-G       | 0.01           | 7.49                         | 5.89                        |
|                       | IPSL-CM5A2-INCA   | 0.08           | 7.21                         | 5.53                        |
|                       | MIROC6            | 0.003          | 7.50                         | 5.89                        |
|                       | NorESM1-LM        | 0.07           | 7.25                         | 5.26                        |
|                       | CESM2             | 0.06           | 7.27                         | 5.27                        |
|                       | EC-Earth3-AerChem | 0.11           | 7.07                         | 5.38                        |
|                       | UKESM1-0-LL       | 0.05           | 7.32                         | 5.59                        |
| Kampala               | GFDL-ESM4         | 0.02           | 13.53                        | 10.45                       |
|                       | GISS-E2-1-G       | 0.01           | 13.60                        | 10.58                       |
|                       | IPSL-CM5A2-INCA   | 0.01           | 13.63                        | 10.49                       |
|                       | MIROC6            | 0.0003         | 13.69                        | 10.68                       |
|                       | NorESM1-LM        | 0.02           | 13.58                        | 10.45                       |
|                       | CESM2             | 0.00006        | 13.69                        | 10.69                       |
|                       | EC-Earth3-AerChem | 0.002          | 13.68                        | 10.68                       |
|                       | UKESM1-0-LL       | 0.01           | 13.60                        | 10.60                       |

|                   |                   |           |       |       |
|-------------------|-------------------|-----------|-------|-------|
| Nairobi           | GFDL-ESM4         | 0.001     | 8.35  | 6.36  |
|                   | GISS-E2-1-G       | 0.003     | 8.34  | 6.31  |
|                   | IPSL-CM5A2-INCA   | 0.02      | 8.28  | 6.05  |
|                   | MIROC6            | 0.004     | 8.35  | 6.29  |
|                   | NorESM1-LM        | 0.08      | 8.01  | 5.71  |
|                   | CESM2             | 0.60      | 8.11  | 5.68  |
|                   | EC-Earth3-AerChem | 0.01      | 8.31  | 6.23  |
|                   | UKESM1-0-LL       | 0.008     | 8.32  | 6.23  |
|                   | Kigali            | GFDL-ESM4 | 0.001 | 13.81 |
| GISS-E2-1-G       |                   | 0.02      | 13.05 | 11.25 |
| IPSL-CM5A2-INCA   |                   | 0.02      | 13.08 | 11.17 |
| MIROC6            |                   | 0.11      | 12.47 | 11.05 |
| NorESM1-LM        |                   | 0.12      | 13.67 | 11.45 |
| CESM2             |                   | 0.05      | 12.85 | 10.85 |
| EC-Earth3-AerChem |                   | 0.00004   | 13.19 | 11.23 |
| UKESM1-0-LL       |                   | 0.001     | 13.18 | 11.25 |
| Lome              |                   | GFDL-ESM4 | 0.95  | 2.96  |
|                   | GISS-E2-1-G       | 0.91      | 4.06  | 3.70  |
|                   | IPSL-CM5A2-INCA   | 0.96      | 2.57  | 1.86  |
|                   | MIROC6            | 0.89      | 4.55  | 4.30  |
|                   | NorESM1-LM        | 0.57      | 8.89  | 6.37  |
|                   | CESM2             | 0.77      | 6.51  | 5.42  |
|                   | EC-Earth3-AerChem | 0.80      | 6.13  | 4.73  |
|                   | UKESM1-0-LL       | 0.93      | 3.54  | 3.07  |
|                   | Dakar             | GFDL-ESM4 | 0.25  | 12.89 |
| GISS-E2-1-G       |                   | 0.23      | 13.03 | 10.63 |
| IPSL-CM5A2-INCA   |                   | 0.15      | 13.76 | 10.88 |
| MIROC6            |                   | 0.22      | 13.14 | 11.20 |
| NorESM1-LM        |                   | 0.31      | 12.40 | 8.63  |
| CESM2             |                   | 0.11      | 14.06 | 10.86 |
| EC-Earth3-AerChem |                   | 0.14      | 13.79 | 10.90 |
| UKESM1-0-LL       |                   | 0.29      | 12.58 | 10.39 |
| Cairo             |                   | GFDL-ESM4 | 0.005 | 13.82 |
|                   | GISS-E2-1-G       | 0.009     | 13.79 | 10.87 |
|                   | IPSL-CM5A2-INCA   | 0.15      | 12.75 | 10.70 |
|                   | MIROC6            | 0.12      | 12.98 | 10.50 |
|                   | NorESM1-LM        | 0.06      | 13.41 | 10.39 |
|                   | CESM2             | 0.15      | 12.79 | 9.07  |
|                   | EC-Earth3-AerChem | 0.03      | 13.62 | 11.00 |
|                   | UKESM1-0-LL       | 0.01      | 13.76 | 10.90 |
|                   | Bamako            | GFDL-ESM4 | 0.03  | 31.06 |
| GISS-E2-1-G       |                   | 0.05      | 30.69 | 24.52 |
| IPSL-CM5A2-INCA   |                   | 0.01      | 31.28 | 24.97 |
| MIROC6            |                   | 0.12      | 29.60 | 23.54 |
| NorESM1-LM        |                   | 0.09      | 30.07 | 24.45 |
| CESM2             |                   | 0.26      | 26.91 | 22.01 |
| EC-Earth3-AerChem |                   | 0.003     | 31.44 | 25.25 |
| UKESM1-0-LL       |                   | 0.10      | 29.84 | 23.72 |

**Table S1.** Comparison of CMIP6 models and surface PM<sub>2.5</sub> observations with reference monitors at U.S. embassy locations in Africa.
